# Supplementary material for: Effects of the Gully Land Consolidation Project on soil properties and carbon stocks of farmland in the Chinese Loess Plateau
Source: PeerJ. 2025 Jun 11;13:e19540. doi: 10.7717/peerj.19540 (PMC12166854; doi:10.7717/peerj.19540)
Supplement: Supplemental Information 1 [file peerj-13-19540-s001.xlsx]

## Sheet: Soil texture
Soil texture of GT-T watershed
Depth (cm)	R5									R15									R35									R60						R70
	Clay (%)			Silt (%)			Sand (%)			Clay (%)			Silt (%)			Sand (%)			Clay (%)			Silt (%)			Sand(%)			Clay (%)		Silt (%)		Sand(%)		Clay (%)		Silt (%)		Sand (%)
	R501	R502	R503	R501	R502	R503	R501	R502	R503	R1501	R1502	R1503	R1501	R1502	R1503	R1501	R1502	R1503	R3501	R3502	R3503	R3501	R3502	R3503	R3501	R3502	R3503	R6001	R6002	R6001	R6002	R6001	R6002	R7001	R7002	R7001	R7002	R7001	R7002
0-10	3.69	2.74	3.2	74.35	75.33	79.81	21.96	21.93	16.98	2.5	2.21	2.31	75.49	74.28	69.97	22.01	23.51	27.71	2.3	1.82	2.39	74.82	73.42	76.16	22.88	24.75	21.44	2.33	2.97	68.06	66.6	29.61	30.43	1.83	2.31	68.05	71.14	30.13	26.55
10-20	3.22	2.64	2.77	72.11	73.72	76.01	24.67	23.64	21.22	2.5	2.04	1.62	79.86	74.88	66.3	17.64	23.08	32.09	2.82	2.2	2.34	78.41	72.01	75.25	18.77	25.79	22.41	1.89	2.78	71.38	67.73	26.72	29.49	2.51	2.63	66.35	71.99	31.14	25.37
20-40	3.22	2.26	2.69	74.57	63.58	78.47	22.2	34.16	18.84	2.11	2.43	2.61	70.66	74.98	78.22	27.23	22.59	19.17	2.24	2.83	2.15	71.5	84.97	73.32	26.26	12.2	24.53	2.47	2.25	67.72	67	29.81	30.75	2.1	2.65	72.08	72.25	25.83	25.1
40-60	3.49	0.74	3.33	76.37	71.67	83.85	20.14	27.6	12.82	2.06	2.18	3.13	70.45	76.18	81.43	27.48	21.63	15.44	2.83	2.52	2.51	68.62	75.33	74.9	28.55	22.15	22.59	2.42	2.51	64.36	67.46	33.22	30.03	3.21	2.66	78.84	75.49	17.95	21.85
60-80	3.59	2.32	2.87	75.64	67.83	76.77	20.77	29.85	20.36	1.81	2	3.09	70.21	73.21	80.6	27.98	24.79	16.31	3.03	1.89	2.15	73.83	71.2	79.36	23.14	26.91	18.49	2.18	2.2	67.88	66.85	29.94	30.95	2.51	3.53	72.71	77.83	24.78	18.65
80-100	3.16	3.13	2.69	74.9	80.75	72.85	21.94	16.12	24.46	2.06	2.39	3.06	75.15	76.21	84.91	22.79	21.4	12.03		2.64	2.44		77.52	74.07		19.84	23.49	2.31	2.18	71.89	68.95	25.8	28.87	2.38	2.14	77.57	60.4	20.05	37.45
100-120	3.53	2.98	2.59	76.43	80.91	73.25	20.04	16.11	24.16	2.15	2.37	3.69	74.2	72.06	84.2	23.65	25.57	12.11		2.66	2.42		75.14	70.48		22.2	27.1	1.06	2.24	66.79	59.47	32.15	38.28	4.2	2.78	77.44	67.82	18.36	29.39
120-140	3.47	3.04	3.03	83.75	77.2	78.21	12.78	19.75	18.75	2.12	2.32	2.95	76.46	74.5	77.48	21.42	23.17	19.58		2.6	2.25		71.78	74.29		25.62	23.46	1.15	2.25	59.25	70.44	39.6	27.31	3.07	4.59	74.23	80.92	22.7	14.49
140-160	3.16	3.06	2.92	76.56	78.81	77.43	20.28	18.13	19.65	2.32	2.05	2.42	76.04	74.97	77.46	21.64	22.98	20.12		3.02	2.34		71.8	66.31		25.19	31.35		1.98		68.07		29.95	3.87	5.08	80.13	78.71	16	16.21
160-180	3.1	2.66	3.3	74.6	78.98	76.18	22.3	18.36	20.52	1.96	2.25	2.8	76.87	72.83	75.45	21.17	24.91	21.75		2.03	1.87		69.24	73.71		28.73	24.43		2.19		70.46		27.34	2.75	3.4	81.15	74.63	16.09	21.97
180-200	3.24	2.33	3.79	70.86	76.86	77.24	25.9	20.8	18.97	2.08	3.38	2.92	78.77	81.26	75.5	19.15	15.36	21.58		2.58	2.41		74.04	68.23		23.38	29.37		2.55		68.28		29.17	2.75	3.92	72.06	81.76	25.19	14.31
200-220	3.34	2.43		72.06	71.17		24.6	26.41		2.57	1.99	2.87	78.13	76.79	79.82	19.3	21.23	17.31		3.02	1.51		75.65	66.84		21.33	31.65								4.37		82.37		13.26
220-240	3.42	2.06		79.73	69.2		16.85	28.74		2.36	3.06	2.57	77.83	77.42	78.42	19.81	19.51	19.01		2.64	2.35		72.33	65.44		25.03	32.21								4.56		82.87		12.57
240-260	3.18	2.66		80.34	71.13		16.48	26.21		3.29	4.49	2.93	79.19	75.77	76.09	17.52	19.74	20.98		2.75	2.24		77.74	69.25		19.51	28.51								4.26		83.22		12.52
260-280	2.98	2.73		72.33	75.19		24.69	22.08		3.69	3.38	3.34	82.32	72.23	83.05	13.99	24.39	13.61		2.07	3.07		80.22	73.77		17.71	23.16								5.35		84.24		10.4
280-300	3.51	2.29		75.1	74.48		21.38	23.24		3.18	2.63	3.2	84.51	60.8	81.79	12.31	36.56	15.01		2.56	2.36		72.88	75.91		24.56	21.74								3.03		82.42		14.55
300-320	3.22	2.6		77.52	71.97		19.255	25.42		3.43		3.85	80.56		82	16.01		14.15		2.59	2.86		73.06	72.35		24.35	24.78								3.43		80.7		15.87
320-340	2.73	2.75		75.07	76.37		22.2	20.88		3.41		3.19	80.17		79.85	16.41		16.97		2.02	2.85		70.98	71.38		27	25.77								2.74		80.92		16.33
340-360	2.9	2.59		78.57	72.48		18.53	24.94		3.55		3.68	81.53		81.53	14.92		14.79		2.28	2.6		66.85	74.31		30.87	23.09								2.54		80.84		16.62
360-380	2.96	2.93		77.11	78.29		19.93	18.78		3.37		3.85	78.86		78.16	17.77		17.99		2.16	2.54		63.56	75.61		34.28	21.85								3.58		84.35		12.07
380-400		2.78			76.67			20.56		3.38		3.33	76.39		75.65	20.23		21.03		2.08	2.96		73.26	79.21		24.67	17.83								3.56		83.84		12.6
400-420	2.56	2.79		71.36	74.55		26.09	22.67		3.38			77.37			19.25				1.69	2.77		71.68	78.22		26.64	19.01								2.87		76.38		20.75
420-440	4.03	3.09		79.24	78.61		16.72	18.31		3.47			77.44			19.08				2.12	2.88		74.63	75.81		23.25	21.31
440-460	3.99	2.72		77.54	82.38		18.46	14.89		3.02			77.5			19.48				2.34	2.98		69.69	77.03		27.96	19.99
460-480	3.44	2.69		81.15	77.1		15.41	20.21		3.32			77.88			18.8					4.11			81.57			14.32
480-500	2.58	3.06		76.28	80.92		21.14	16.02		3.22			77.25			19.53					2.91			79.77			17.31

## Sheet: BD (g cm-3)
Soil bulk density (BD) of GT-T watershed (g cm-3)
Depth (cm)	R5			R15			R35			R60			R70
	R501	R502	R503	R1501	R1502	R1503	R3501	R3502	R3503	R6001	R6002	R6003	R7001	R7002
0-10	1.4144	1.3747	1.383	1.4728	1.3793	1.385	1.11951	1.21163	1.0122	1.2703	1.2956	1.3446	1.4447	1.2056
10-20	1.5672	1.388	1.5555	1.5397	1.3263	1.4006	1.1228	1.30123	1.1154	1.3604	1.1952	1.4237	1.3532	1.3375
20-40	1.6238	1.5166	1.73	1.512	1.3086	1.3608	1.35556	1.27653	1.21091	1.4271	1.4842	1.4383	1.4773	1.3954
40-60	1.7476	1.4374	1.6576	1.5724	1.3055	1.3593	1.38032	1.24866	1.19229	1.5015	1.4426	1.4435	1.5733	1.3753
60-80	1.7617	1.4772	1.8049	1.5989	1.3155	1.5595	1.18386	1.11441	1.19994	1.4174	1.4857	1.5031	1.7104	1.6583
80-100	1.6497	1.5113	1.7878	1.554	1.4902	1.4133		1.31582	1.19067	1.4913	1.41	1.436	1.6923	1.6924
100-120	1.6528	1.4629	1.7053	1.5267	1.8249	1.388		1.26226	1.33617	1.4409	1.4699	1.4629	1.6981	1.6865
120-140	1.6194	1.5088	1.5568	1.5679	1.5731	1.3082		1.24023	1.28491	1.3932	1.4187	1.4926	1.7594	1.7704
140-160	1.6032	1.5122	1.5704	1.5738	1.6409	1.4139		1.29663	1.21889	1.503	1.5285	1.4581	1.6652	1.7779
160-180	1.611	1.5035	1.6736	1.5689	1.4126	1.2583		1.16792	1.17	1.4343	1.3669	1.49993	1.6482	1.7235
180-200	1.784	1.4688	1.4971	1.5414	1.4646	1.4577		1.18125	1.1634	1.4365	1.4344	1.35363		1.741
200-220	1.7124	1.4894		1.544	1.5784	1.4358		1.18901	1.21641	1.4077	1.4226			1.7236
220-240	1.6957	1.4698		1.5143	1.7167	1.598		1.17522	1.25052	1.4798	1.3679			1.622
240-260	1.7213	1.3958		1.5385	1.5026	1.4384		1.15148	1.26104	1.4319	1.413			1.5863
260-280	1.5856	1.4155		1.5652	1.4995	1.4775		1.24584	1.15797	1.4077	1.4358			1.6811
280-300	1.7449	1.4129		1.5224	1.4553	1.3025		1.09092	1.24972	1.4066	1.4919			1.6794
300-320	1.7459	1.3707		1.5818		1.3529		1.26887	1.26119	1.4162	1.4548			1.5812
320-340	1.7479	1.4056		1.6273		1.3849		1.2511	1.24438	1.4627	1.4161			1.6014
340-360	1.6926	1.3314		1.6064		1.2577		1.25094	1.24784	1.4729	1.3854			1.6689
360-380	1.4414	1.4102		1.6034		1.5704		1.25428	1.22576	1.5227	1.4498			1.7326
380-400	1.708	1.3755		1.6547		1.4401		1.24747	1.16399	1.5107	1.3742			1.681
400-420	1.6154	1.4327		1.6845				1.20352	1.14359	1.4066	1.3825
420-440	1.6951	1.4684		1.6339				1.31766	1.13468	1.3378	1.4006
440-460	1.7019	1.4802		1.6512				1.33922	1.14415	1.3694	1.3558
460-480	1.6675	1.449		1.6408					1.14296	1.3382	1.3997
480-500	1.6823	1.4023		1.6719					1.15463	1.4411	1.4426

## Sheet:  SWC (%)
Soil water content (SWC) of GT-T watershed
Depth (cm)	R5			R15			R35			R60			R70
	R501	R502	R503	R1501	R1502	R1503	R3501	R3502	R3503	R6001	R6002	R6003	R7001	R7002
0-10	0.105706	0.12416	0.0999379	0.109581	0.137329	0.135508	0.146373	0.163253	0.18746	0.152847	0.137079	0.147841	0.104306	0.112507
10-20	0.186649	0.108825	0.158084	0.162953	0.117647	0.200807	0.16934	0.137112	0.155061	0.0995923	0.109605	0.196635	0.152542	0.168844
20-40	0.137692	0.120829	0.136676	0.12369	0.133096	0.193378	0.142483	0.140963	0.128275	0.0992529	0.0948891	0.196788	0.18373	0.16559
40-60	0.132003	0.131467	0.156161	0.117876	0.128235	0.200338	0.122546	0.131968	0.128378	0.0869565	0.0669937	0.198456	0.180036	0.157236
60-80	0.128842	0.121358	0.11828	0.15944	0.145495	0.202391	0.133716	0.128827	0.129913	0.082866	0.0511364	0.229388	0.191995	0.182143
80-100	0.135462	0.179436	0.153153	0.162592	0.154212	0.207584		0.139988	0.117829	0.114516	0.0493752	0.250944	0.161152	0.128683
100-120	0.146329	0.177622	0.166724	0.179308	0.143927	0.193587		0.137626	0.112944	0.127204	0.0567254	0.249241	0.180952	0.156534
120-140	0.146166	0.178447	0.167638	0.20125	0.172204	0.179894		0.13615	0.103531	0.0966851	0.0767918	0.237232	0.207498	0.195254
140-160	0.152259	0.199329	0.189216	0.205403	0.155364	0.185674		0.106509	0.130977	0.125576	0.107374	0.248015	0.22069	0.192237
160-180	0.158968	0.198065	0.179647	0.217316	0.215974	0.212045		0.116818	0.126019	0.141461	0.113981	0.242843	0.185363	0.184036
180-200	0.138029	0.200673	0.203564	0.22546	0.237822	0.214953		0.142407	0.119639	0.120666	0.12407	0.241661		0.209805
200-220	0.171725	0.189647		0.229136	0.216569	0.211655		0.131479	0.111784	0.163604	0.128805			0.202209
220-240	0.173913	0.197565		0.245092	0.177145	0.208426		0.11571	0.10492	0.148504	0.191231			0.200803
240-260	0.172955	0.212636		0.248138	0.22091	0.219768		0.147305	0.118955	0.198436	0.207406			0.200611
260-280	0.180005	0.204541		0.249301	0.228239	0.227273		0.137352	0.125465	0.20236	0.169343			0.192005
280-300	0.183249	0.219747		0.254524	0.284831	0.204322		0.175231	0.139432	0.277475	0.252826			0.197094
300-320	0.169122	0.226917		0.235412		0.212968		0.159079	0.122408	0.255319	0.20665			0.191976
320-340	0.154801	0.21048		0.247842		0.217137		0.12049	0.0952632	0.258812	0.249694			0.19711
340-360	0.178493	0.212069		0.2215		0.228621		0.119431	0.139241	0.282008	0.288552			0.19893
360-380	0.185224	0.21593		0.223547		0.220126		0.103768	0.141806	0.24481	0.262097			0.205021
380-400	0.182375	0.21409		0.218956		0.184987		0.170732	0.13522	0.264086	0.28203			0.199214
400-420	0.175711	0.216262		0.223266				0.174653	0.175551	0.335175	0.280453
420-440	0.181505	0.21494		0.205565				0.172113	0.150179	0.325417	0.285976
440-460	0.184821	0.217197		0.206027				0.174342	0.150339	0.259273	0.281194
460-480	0.190156	0.217695		0.228152					0.190137	0.293558	0.280103
480-500	0.193084	0.229456		0.222298					0.219947	0.291715	0.26512

## Sheet: TC (g kg-1)
Soil total carbon (TC) content of GT-T watershed (g kg-1)
Depth (cm)	R5			R15			R35			R60			R70
	R501	R502	R503	R1501	R1502	R1503	R3501	R3502	R3503	R6001	R6002	R6003	R7001	R7002
0-10	14.16	15.96	12.23	17.4	17.03	13.48	17.64	17.31	17.42	16.89	17.67	19.46	14.26	17.18
10-20	13.84	15.38	12.24	17.62	16.4	13.4	16.37	15.16	17.74	17.4	16.21	15.92	14.6	15.53
20-40	12.9	14.43	10.88	16.2	15.6	17.82	16.39	15.41	17.81	15.52	15.57	14.42	14.13	17.07
40-60	15.92	15.2	13.91	14.45	16.5	14.23	13.18	14.99	17.25	13.87	15.35	16	15.75	14.58
60-80	16.29	13.9	15.16	16.04	16.8	14.19	16.82	14.7	17	14.15	14.16	15.58	15.9	6.23
80-100	15.64	10.04	14.73	14.4	17.76	13.45		16.19	15.69	13.73	15.73	14.96	15.62	6.85
100-120	16.5	14	13.3	13.8	16.4	11		16	14.15	14.9	15.3	14.8	14.6	14.6
120-140	16.5	12.2	14.7	14	16.6	13.1		15.4	15.6	14.9	15.1	16	9.8	19.5
140-160	16	12.7	13.5	14.8	17.3	12.4		14.8	15.6	14.4	13.6	14.4	14.4	10.8
160-180	13.8	16.3	15	14.7	15.4	13.2		15.6	16.4	14	14.5	15.6	13.5	17
180-200	14.9	16.5	13.7	14.1	14.9	12.5		15.1	15.4	13.4	15.1	16.9		11.9
200-220	13.5	16.7		14.4	16.2	12.7		15.1	15.8	14.8	12.7			15
220-240	13.4	16.7		13.7	24.8	13.9		15.2	16.4	13	15.4			12.9
240-260	13.9	16.9		12	12.3	12.7		15.1	16.3	13.9	15.4			11.7
260-280	13.6	16.7		4.9	7.8	12.9		14.4	16.4	14.7	14.9			9.8
280-300	16.1	16.8		4.1	3.2	10.7		14.3	15.6	13.2	13.2			18.4
300-320	16	16.4		3.3		11.3		14.5	16.6	21.5	15.1			18.3
320-340	13.7	17		3.2		12.1		14.3	16.7	15	15.1			16.5
340-360	16.5	16.9		3.7		12.4		13.3	17.7	13.8	12.7			17.2
360-380	12.7	16.7		3		10.9		13.4	16.3	13.7	14.7			14.8
380-400	16.2	16.4		1.2		10.5		14.4	17.6	15.8	18.7			15.9
400-420	10.7	15.9		1.3				14.6	17.5	19.7	15.6
420-440	11.2	13.6		1.8				15.8	18.4	14.9	13.8
440-460	14.2	18.2		2				14.4	17.5	13.6	13.2
460-480	21.8	16.4		1.7					19.7	17.6	14.1
480-500	14.7	16.8		1.5					18.3	13.6	13.2

## Sheet: SIC (g kg-1)
Soil inorganic carbon (SIC) content of GT-T watershed (g kg-1)
Depth (cm)	R5			R15			R35			R60			R70
	R501	R502	R503	R1501	R1502	R1503	R3501	R3502	R3503	R6001	R6002	R6003	R7001	R7002
0-10	11.8	13.66	10.91	15.67	14.58	11.25	13.51	13.35	14.12	15.84	13.95	13.52	12.23	12.66
10-20	10.21	13.59	11.53	16.32	15.2	11.37	13.75	13.15	13.97	16.58	13.58	14.4	12.44	12.08
20-40	12.09	13.37	7.71	15.66	14.56	12.62	13.3	13.58	14.09	15.24	13.51	12.73	12.44	12.96
40-60	14.91	13.47	13.26	13.9	15.55	13.44	12.49	12.81	14.38	13.46	13.48	12.67	14.32	12.79
60-80	14.74	12.26	14.38	15.1	15.27	13.54	14.97	12.83	15.75	14.03	12.69	13.19	13.6	4.75
80-100	13.91	7	13.67	13.31	15.55	13.09		14.39	14	12.29	14.51	13.18	14.45	5.81
100-120	13.08	10.67	10.66	12.77	13.75	10.12		13.11	14.15	12.45	13.98	13.3	13.56	13.2
120-140	12.97	8.81	13.56	12.94	14.08	12.53		13.43	13.46	12.37	13.6	14.48	9.71	17.51
140-160	13.28	9.53	12.58	13.45	13.97	11.86		13.32	13.52	12.74	12.83	12.96	9.58	7.22
160-180	11.72	14.3	13.22	13	13.3	11.95		13.15	14.42	12.18	13.1	13.53	7.94	12.91
180-200	12.41	14.37	13.14	13.06	13.23	12.4		12.67	13.72	11.36	13.54	15.09		10.55
200-220	11.65	14.66		12.91	14.26	12.46		12.62	13.09	12.42	11.87			13.47
220-240	12.45	14.93		12.77	22.1	13.45		12.47	14.55	11.49	13.44			8.56
240-260	12.11	14.74		9.36	11.45	12.52		11.75	14.03	11.72	13.58			8.52
260-280	11.45	14.68		2.68	6	12.31		11.95	14.17	12.06	13.5			6.44
280-300	14.14	14.8		2.22	1.7	10.66		12.54	14.03	10.99	12.21			15.68
300-320	13.19	13.2		1.68		11.2		11.66	14.3	16.48	12.74			15.6
320-340	10.34	13.99		1.54		11.88		11.4	14.51	12.22	13.21			12.98
340-360	13.91	14.76		2.14		11.88		11.26	14.78	12.24	12.19			12.47
360-380	9.71	13.39		0.69		10.68		10.75	14.54	10.65	13.61			11.69
380-400	12.48	13.98		0.37		9.5		11.4	15.3	12.51	16.73			12.73
400-420	8	13.34		0.37				10.96	16.3	14.11	14.23
420-440	8.89	10.82		1.54				10.17	15.59	13.27	12.5
440-460	12.25	15.09		1.38				10.2	15.39	12.07	11.69
460-480	18.24	14.42		0.16					17.95	15.28	11.97
480-500	13.44	12.98		1.23					16.48	11.71	12.15

## Sheet: SOC (g kg-1) 
Soil organic carbon (SOC) content of GT-T watershed (g kg-1)
Depth (cm)	R5			R15			R35			R60			R70
	R501	R502	R503	R1501	R1502	R1503	R3501	R3502	R3503	R6001	R6002	R6003	R7001	R7002
0-10	2.36	2.3	1.32	1.73	2.45	2.23	4.13	3.96	3.3	1.05	3.72	5.94	2.03	4.52
10-20	3.63	1.79	0.71	1.3	1.2	2.03	2.62	2.01	3.77	0.82	2.63	1.52	2.16	3.45
20-40	0.81	1.06	3.17	0.54	1.04	5.2	3.09	1.83	3.72	0.28	2.06	1.69	1.69	4.11
40-60	1.01	1.73	0.65	0.55	0.95	0.79	0.69	2.18	2.87	0.41	1.87	3.33	1.43	1.79
60-80	1.55	1.64	0.78	0.94	1.53	0.65	1.85	1.87	1.25	0.12	1.47	2.39	2.3	1.48
80-100	1.73	3.04	1.06	1.09	2.21	0.36		1.8	1.69	1.44	1.22	1.78	1.17	1.04
100-120	3.42	3.33	2.64	1.03	2.65	0.88		2.89		2.45	1.32	1.5	1.04	1.4
120-140	3.53	3.39	1.14	1.06	2.52	0.57		1.97	2.14	2.53	1.5	1.52	0.09	1.99
140-160	2.72	3.17	0.92	1.35	3.33	0.54		1.48	2.08	1.66	0.77	1.44	4.82	3.58
160-180	2.08	2	1.78	1.7	2.1	1.25		2.45	1.98	1.82	1.4	2.07	5.56	4.09
180-200	2.49	2.13	0.56	1.04	1.67	0.1		2.43	1.68	2.04	1.56	1.81		1.35
200-220	1.85	2.04		1.49	1.94	0.24		2.48	2.71	2.38	0.83			1.53
220-240	0.95	1.77		0.93	2.7	0.45		2.73	1.85	1.51	1.96			4.34
240-260	1.79	2.16		2.64	0.85	0.18		3.35	2.27	2.18	1.82			3.18
260-280	2.15	2.02		2.22	1.8	0.59		2.45	2.23	2.64	1.4			3.36
280-300	1.96	2		1.88	1.5	0.04		1.76	1.57	2.21	0.99			2.72
300-320	2.81	3.2		1.62		0.1		2.84	2.3	5.02	2.36			2.7
320-340	3.36	3.01		1.66		0.22		2.9	2.19	2.78	1.89			3.52
340-360	2.59	2.14		1.56		0.52		2.04	2.92	1.56	0.51			4.73
360-380	2.99	3.31		2.31		0.22		2.65	1.76	3.05	1.09			3.11
380-400	3.72	2.42		0.83		1		3	2.3	3.29	1.97			3.17
400-420	2.7	2.56		0.93				3.64	1.2	5.59	1.37
420-440	2.31	2.78		0.26				5.63	2.81	1.63	1.3
440-460	1.95	3.11		0.62				4.2	2.11	1.53	1.51
460-480	3.56	1.98		1.54					1.75	2.32	2.13
480-500	1.26	3.82		0.27					1.82	1.89	1.05

## Sheet: TCS (kg m-2)
Soil total carbon stocks (TCS) of GT-T watershed (kg m-2)
Depth (cm)	R5			R15			R35			R60			R70
	R501	R502	R503	R1501	R1502	R1503	R3501	R3502	R3503	R6001	R6002	R6003	R7001	R7002
0-10	2.00263	2.19338	1.69158	2.56177	2.34952	3.42462	1.97416	2.09779	1.76312	2.1456	2.28859	2.61687	2.05995	2.07218
10-20	2.16788	2.13456	1.90387	2.71373	2.17526	3.46901	1.83855	1.97225	1.97903	2.36696	1.93716	2.26581	1.97557	2.07702
20-40	4.1894	4.37888	3.76398	4.89868	4.08283	4.85023	4.44485	3.93379	4.31244	4.4302	4.622	4.15028	4.17502	4.76411
40-60	5.56571	4.37077	4.61275	4.54216	4.30844	3.86967	3.63832	3.74357	4.11279	4.16744	4.42899	4.61746	4.95512	4.01209
60-80	5.73823	4.10663	5.47279	5.12977	4.4212	4.42504	3.98221	3.27635	4.07923	4.01071	4.20528	4.68296	5.43978	2.06662
80-100	5.16117	3.03498	5.26751	4.47523	5.29494	3.80258		4.25973	3.73663	4.09324	4.43621	4.2962	5.2889	2.31753
100-120	5.45424	4.09612	4.5361	4.21369	5.98567	3.0536		4.03922	4.35592	4.29388	4.49789	4.33018	4.95845	4.92458
120-140	5.34402	3.68147	4.57699	4.39012	5.22269	3.42748		3.81991	4.00892	4.15174	4.28447	4.77632	3.44842	6.90456
140-160	5.13024	3.84099	4.24008	4.65845	5.67751	3.50647		3.83804	3.80294	4.32864	4.15752	4.19933	4.79578	3.84026
160-180	4.44636	4.90141	5.0208	4.61257	4.35081	3.32191		3.64391	3.83759	4.01604	3.96401	4.67978	4.45014	5.8599
180-200	5.31632	4.84704	4.10205	4.34675	4.36451	3.64425		3.56737	3.58326	3.84982	4.33189	4.57528		4.14358
200-220	4.62348	4.9746		4.44672	5.11402	3.64693		3.5908	3.84386	4.16679	3.6134			5.1708
220-240	4.54448	4.90913		4.14918	8.51483	4.44244		3.57267	4.10169	3.84748	4.21313			4.18476
240-260	4.78521	4.7178		3.6924	3.6964	3.65354		3.47747	4.11099	3.98068	4.35204			3.71194
260-280	4.31283	4.72777		1.5339	2.33922	3.81195		3.58801	3.79815	4.13864	4.27868			3.29496
280-300	5.61858	4.74734		1.24837	0.931392	2.78735		3.12004	3.89912	3.71342	3.93862			6.18019
300-320	5.58688	4.4959		1.04399		3.05755		3.67971	4.18714	6.08966	4.3935			5.78719
320-340	4.78925	4.77904		1.04147		3.35146		3.57816	4.15621	4.3881	4.27662			5.28462
340-360	5.58558	4.50013		1.18874		3.1191		3.32749	4.41736	4.0652	3.51892			5.74102
360-380	3.66116	4.71007		0.96204		3.42347		3.36146	3.99597	4.1722	4.26241			5.1285
380-400	5.53392	4.51164		0.397128		3.02421		3.59271	4.09726	4.77381	5.13951			5.34558
400-420	3.45696	4.55599		0.43797				3.51428	4.00258	5.542	4.3134
420-440	3.79702	3.99405		0.588204				4.16382	4.17563	3.98664	3.86566
440-460	4.8334	5.38793		0.66048				3.85695	4.00454	3.72477	3.57931
460-480	7.2703	4.75272		0.557872					4.50326	4.71046	3.94715
480-500	4.94596	4.71173		0.50157					4.22596	3.91979	3.80846

## Sheet: SICS (kg m-2)
Soil inorganic carbon stocks (SICS) of GT-T watershed (kg m-2)
Depth (cm)	R5			R15			R35			R60			R70
	R501	R502	R503	R1501	R1502	R1503	R3501	R3502	R3503	R6001	R6002	R6003	R7001	R7002
0-10	1.66929	1.87744	1.50918	2.30726	2.01147	3.11644	1.51226	1.61792	1.42886	2.01165	1.80691	1.81789	1.76639	1.52689
10-20	1.59949	1.88624	1.7938	2.51322	2.01609	3.18405	1.54414	1.71049	1.55803	2.25508	1.62285	2.0495	1.68359	1.61535
20-40	3.92488	4.05629	2.6674	4.73545	3.80959	3.43589	3.60596	3.46589	3.41195	4.35094	4.01098	3.66322	3.67463	3.61719
40-60	5.21205	3.87354	4.39651	4.37042	4.0596	3.65397	3.44871	3.19824	3.4279	4.04283	3.89024	3.65663	4.5058	3.51937
60-80	5.19333	3.62104	5.19035	4.82927	4.01765	4.22176	3.54348	2.85986	3.77963	3.97746	3.76952	3.96513	4.65291	1.57519
80-100	4.58888	2.11554	4.88917	4.13799	4.63533	3.69977		3.78665	3.33353	3.66435	4.09137	3.78553	4.89176	1.9663
100-120	4.3244	3.12282	3.63458	3.90035	5.0178	2.80936		3.309	3.78125	3.58684	4.11065	3.89183	4.60502	4.45235
120-140	4.20167	2.65951	4.22356	4.05706	4.42838	3.27821		3.33007	3.46011	3.44618	3.85909	4.3211	3.41569	6.20106
140-160	4.25909	2.88316	3.9508	4.23261	4.58412	3.35494		3.4537	3.29529	3.83115	3.921	3.7808	3.18982	2.5677
160-180	3.77624	4.30063	4.42403	4.08057	3.75828	3.00752		3.0707	3.3747	3.49511	3.57999	4.05801	2.61746	4.45055
180-200	4.42862	4.22116	3.93479	4.02579	3.87563	3.61623		2.99305	3.19271	3.26257	3.88393	4.0841		3.67434
200-220	3.99106	4.36621		3.98558	4.50033	3.57901		3.00029	3.18427	3.49583	3.3778			4.64275
220-240	4.22312	4.38786		3.86867	7.58688	4.29926		2.93037	3.63946	3.39954	3.67753			2.77539
240-260	4.16909	4.11425		2.88115	3.44044	3.60128		2.70685	3.53906	3.35684	3.83713			2.70152
260-280	3.63001	4.15535		0.838656	1.80065	3.63705		2.97772	3.28243	3.39646	3.87675			2.16496
280-300	4.93489	4.18301		0.676672	0.494156	2.77808		2.73676	3.50697	3.09094	3.64399			5.26538
300-320	4.60435	3.6198		0.532818		3.03158		2.95878	3.60795	4.66697	3.70721			4.93286
320-340	3.61492	3.93194		0.500574		3.28969		2.8531	3.61222	3.57498	3.74099			4.15729
340-360	4.71004	3.9308		0.687784		2.98874		2.81626	3.68833	3.60663	3.37651			4.1621
360-380	2.79923	3.77681		0.220923		3.3548		2.69567	3.56332	3.2426	3.94693			4.04936
380-400	4.26408	3.84481		0.121525		2.73747		2.8447	3.5615	3.78076	4.59846			4.28097
400-420	2.58509	3.82282		0.123613				2.63844	3.72904	3.97042	3.93446
420-440	3.01246	3.17907		0.501728				2.68004	3.53879	3.55066	3.50112
440-460	4.1697	4.46737		0.455405				2.73321	3.52165	3.30688	3.17037
460-480	6.08162	4.17929		0.0523658					4.10435	4.08896	3.3498
480-500	4.52336	3.64158		0.412546					3.80514	3.37499	3.50475

## Sheet:  SOCS (kg m-2)
Soil organic carbon stocks (SOCS) of GT-T watershed (kg m-2)
Depth (cm)	R5			R15			R35			R60			R70
	R501	R502	R503	R1501	R1502	R1503	R3501	R3502	R3503	R6001	R6002	R6003	R7001	R7002
0-10	0.333342	0.315942	0.1824	0.254508	0.338054	0.308177	0.461904	0.479869	0.334259	0.133948	0.481674	0.79898	0.293562	0.545291
10-20	0.568388	0.24832	0.110065	0.200517	0.159176	0.284957	0.29441	0.261766	0.421	0.111874	0.314314	0.216309	0.291985	0.461672
20-40	0.264529	0.322595	1.09657	0.163227	0.273241	1.41434	0.838888	0.467901	0.90049	0.079262	0.611014	0.487053	0.500394	1.14693
40-60	0.35366	0.497233	0.216237	0.171734	0.248834	0.215699	0.189604	0.545333	0.684892	0.12461	0.538757	0.960832	0.449328	0.492723
60-80	0.5449	0.485588	0.282443	0.300497	0.403546	0.203285	0.438733	0.41649	0.299603	0.0332518	0.435759	0.717828	0.786868	0.491433
80-100	0.572293	0.919434	0.378339	0.33724	0.659612	0.102816		0.473082	0.403099	0.428892	0.344841	0.510669	0.397143	0.351227
100-120	1.12984	0.973304	0.901513	0.313338	0.967868	0.244239		0.730222	0.574674	0.707045	0.387245	0.438351	0.353433	0.47223
120-140	1.14235	1.02196	0.353436	0.333063	0.794314	0.149277		0.489832	0.548806	0.705559	0.425381	0.455215	0.0327359	0.703497
140-160	0.871145	0.957827	0.289284	0.425841	1.0934	0.151532		0.384339	0.507653	0.497495	0.236515	0.418527	1.60596	1.27256
160-180	0.670116	0.600775	0.596771	0.531998	0.592531	0.314395		0.573212	0.462895	0.520932	0.384022	0.621769	1.83268	1.40935
180-200	0.887696	0.625881	0.167263	0.320954	0.488875	0.0280211		0.574323	0.390558	0.587246	0.447962	0.491185		0.46924
200-220	0.632416	0.608383		0.461141	0.613681	0.0679218		0.590504	0.659595	0.670964	0.235601			0.528049
220-240	0.321352	0.521274		0.280507	0.927947	0.143184		0.642299	0.462232	0.447936	0.535602			1.40937
240-260	0.616125	0.603553		0.811253	0.255961	0.0522553		0.770613	0.571926	0.623847	0.514909			1.01042
260-280	0.682827	0.57242		0.69524	0.538568	0.174897		0.610284	0.515717	0.742182	0.401932			1.12999
280-300	0.68369	0.564338		0.571696	0.437236	0.00926869		0.383272	0.392149	0.622488	0.294627			0.914816
300-320	0.982532	0.876101		0.51117		0.0259745		0.720928	0.579191	1.42269	0.686284			0.854328
320-340	1.17433	0.847096		0.540898		0.0617666		0.725054	0.543992	0.813119	0.53563			1.12733
340-360	0.875542	0.569334		0.500952		0.130352		0.511225	0.729036	0.458573	0.142405			1.57892
360-380	0.861923	0.933257		0.741117		0.0686713		0.665785	0.432651	0.929596	0.315487			1.07914
380-400	1.26984	0.666832		0.275603		0.286736		0.748006	0.535753	0.993053	0.541044			1.06461
400-420	0.871871	0.733167		0.314357				0.875838	0.273541	1.57158	0.378943
420-440	0.784565	0.814977		0.0864757				1.48378	0.636837	0.43598	0.364541
440-460	0.663692	0.920554		0.205075				1.12373	0.48289	0.417885	0.408942
460-480	1.18868	0.573428		0.505506					0.398914	0.621506	0.597356
480-500	0.422602	1.07015		0.0890244					0.420818	0.544802	0.303711

## Sheet: Raw data for Figure
Raw data for Figure 2, Figure 3a, Figure 5a and Figure 6 are provided in Table 1. Raw data for Figure 3b, Figure 5b are followed:
GT-U watershed (Zhao et al., 2019b)				Jiegou watershed (Yu et al., 2019)			Longtan watershed (Yang et al., 2012)			Laoyemanqu watershed (Wang et al., 2016)
Depth (cm)	SWC (%)	BD (g/cm3)		Depth (cm)	SWC (%)		Depth (cm)	SWC (%)		Depth (cm)	SWC (%)
10		1.3		20	10.6		0-100	8.3		0-10	9.0 ± 2.5
20	13.3	1.33		40	11.6		100-200	7.7		10-20	8.9 ± 3.0
40	11.3	1.45		60	11.2		200	9		20-60	9.2 ± 2.4
60	9.9	1.46		80	10.8		220	8.8		60-100	10.0 ± 2.5
80	9.8	1.47		100	10.4		240	8.3		100-200	8.5 ± 3.7
100	9.7	1.45		120	10.4		260	9		200-300	8.2 ± 3.6
120	9.7	1.46		140	10.5		280	9.2		300-400	7.8 ± 3.2
140	10.1	1.43		160	10.6		300	9.3		400-500	7.7 ± 3.3
160	10.3	1.5		180	10.7		320	9.3
180	10.1	1.4		200	10.8		340	9.6
200	10.3	1.44		220	11		360	10.1
220	10.7	1.41		240	11.2		380	10.4
240	11	1.42		260	11.4		400	10.8
260	10.9	1.42		280	11.7		420	11.7
280	11.2	1.42		300	11.9		440	11.2
300	10.8	1.45		320	12		460	11.4
320	10.3			340	12.2		480	11.4
340	10.3			360	12.2		500	11.7
360	10.2			380	12.9
380	10.5			400	12.4
400	10.2			420	12.4
420	10.5			440	11.8
440	10.6			460	11.3
460	10.7			480	11.2
480	10.5			500	10.4
500	10.7
